# Supplementary material
Source: Springer Nature journal article supplement (https://cris.unibo.it/retrieve/a3599eca-1d3b-441e-8fd8-515379a82e4f/41997_2022_652_MOESM2_ESM.docx)
Supplement: MOESM2 [file 41997_2022_652_MOESM2_ESM.docx]

**Appendix B. Supplementary File**

**Figure 1S.** Quality assessment of RCTs in accordance with the Cochrane Tool for Quality Assessment

**
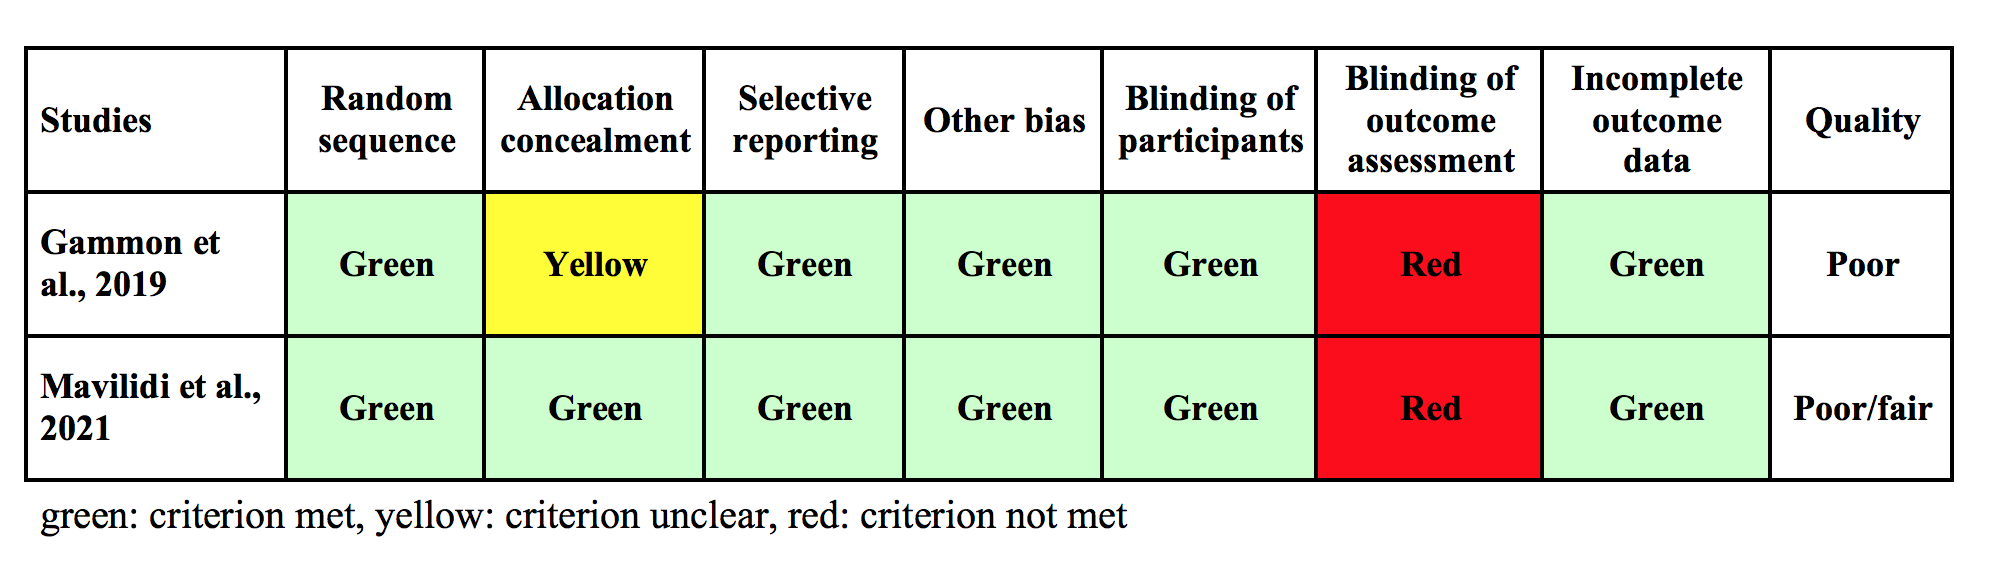
**
